# Supplementary material for: Neuropathic agents in the management of pruritus in burn injuries: a systematic review and meta-analysis
Source: HighWire-hosted journal article supplement (doi:10.1136/tsaco-2021-000810), 2021-10-01
Supplement: tsaco-2021-000810supp001_data_supplement.pdf [file tsaco-2021-000810supp001_data_supplement.pdf]

## Neuropathic agents in the management of pruritus in burn injuries – Supplementary material 4: Risk of Bias and GRADE Assessment

McGovern C, Quasim T, Puxty K, Shaw M, Ng W, Gilhooly C, Basler M, Macfarlane A, Paton L

### Contents

- Cochrane database search strategy p.2
- EMBASE search strategy p.4
- MEDLINE search strategy p.6
- Figure S1. PRISMA flowchart p.8
- Table S1. Risk of bias assessment – RCTs p.9
- Table S2. Risk of bias assessment – non-randomised studies p.10
- Figure S2. Funnel plot – meta-analysis of gabapentinoids and pruritus p.11
- Figure S3. Funnel plot – meta-analysis of doxepin and pruritus p.11
- Table S3. GRADE assessment of evidence p.12

## Cochrane Database Search Strategy

Date Run: 07/01/2020 14:23:05

#1 (burn):ti,ab,kw 3694

#2 MeSH descriptor: [Burns] explode all trees 1620

#3 (thermal inj\*):ti,ab,kw 962

#4 {or #1-#3} 4935

#5 MeSH descriptor: [Pain] explode all trees 45940

#6 (pain):ti,ab,kw 165847

#7 MeSH descriptor: [Chronic Pain] explode all trees 2044

#8 MeSH descriptor: [Neuralgia] explode all trees 1500

#9 (neuralgia):ti,ab,kw 2692

#10 MeSH descriptor: [Neuralgia] explode all trees 1500

#11 (neuralgia):ti,ab,kw 2692

#12 MeSH descriptor: [Neuralgia] explode all trees 1500

#13 (neuropathic):ti,ab,kw 3992

#14 MeSH descriptor: [Pruritus] explode all trees 1448

#15 (pruritis):ti,ab,kw 365

#16 (itch):ti,ab,kw 1385

#17 {or #5-#16} 174719

#18 MeSH descriptor: [Anticonvulsants] explode all trees 2342

#19 (anticonvuls\*):ti,ab,kw 4069

#20 (antiepilept\*):ti,ab,kw 2725

#21 MeSH descriptor: [Gabapentin] explode all trees 763

#22 (gabapentin\*):ti,ab,kw 2311

#23 MeSH descriptor: [Pregabalin] explode all trees 698

#24 (pregabalin):ti,ab,kw 1924

#25 MeSH descriptor: [Carbamazepine] explode all trees 802

#26 (carbamazepine):ti,ab,kw 2131

#27 MeSH descriptor: [Oxcarbazepine] explode all trees 133

#28 (oxcarbazepine):ti,ab,kw 500

#29 MeSH descriptor: [Lamotrigine] explode all trees 421

#30 (lamotrigine):ti,ab,kw 1255

#31 MeSH descriptor: [Antidepressive Agents] explode all trees 5574

- #32 (antidepress\*):ti,ab,kw 15527
- #33 MeSH descriptor: [Duloxetine Hydrochloride] explode all trees 445
- #34 (duloxetine):ti,ab,kw 1293
- #35 MeSH descriptor: [Amitriptyline] explode all trees 1159
- #36 (amitriptyline):ti,ab,kw 2549
- #37 MeSH descriptor: [Nortriptyline] explode all trees 435
- #38 (nortriptyline):ti,ab,kw 843
- #39 MeSH descriptor: [Venlafaxine Hydrochloride] explode all trees 625
- #40 (venlafaxine):ti,ab,kw 1798
- #41 MeSH descriptor: [Milnacipran] explode all trees 122
- #42 (milnacipran):ti,ab,kw 296
- #43 (serotonin NEAR inhibitor):ti,ab,kw 2558
- #44 MeSH descriptor: [Capsaicin] explode all trees 573
- #45 (capsaicin):ti,ab,kw 1246
- #46 MeSH descriptor: [Lidocaine] explode all trees 5568
- #47 (lidocaine):ti,ab,kw 11702
- #48 (lignocaine):ti,ab,kw 1624
- #49 MeSH descriptor: [Anesthesia] explode all trees 18751
- #50 MeSH descriptor: [Anesthesia, Local] explode all trees 2076
- #51 (anaesth\*):ti,ab,kw 24993
- #52 (anesth\*):ti,ab,kw 66849
- #53 MeSH descriptor: [Ketamine] explode all trees 1942
- #54 (neuropath\* NEAR drug):ti,ab,kw 2110
- #55 (neuropath\* NEAR agent):ti,ab,kw 47
- #56 {or #18-#55} 113368
- #57 #4 and #17 and #56 33

**EMBASE search strategy**

1. exp burn/
2. burn\*.tw.
3. exp thermal injury/
4. (thermal adj3 injur\*).tw.
5. 1 or 2 or 3 or 4
6. exp pain/
7. pain.tw.
8. exp chronic pain/
9. chronic pain.tw.
10. exp neuralgia/
11. neuralgia.tw.
12. exp neuropathic pain/
13. exp pruritus/
14. pruritis.tw.
15. itch\*.tw.
16. or/6-15
17. exp anticonvulsive agent/
18. anticonvuls\*.mp.
19. antiepilept\*.mp.
20. exp gabapentin/
21. gabapentin\*.mp.
22. exp pregabalin/
23. pregabalin.mp.
24. exp carbamazepine/
25. carbamazepine.mp.
26. exp oxcarbazepine/
27. Oxcarbazepine.mp.
28. exp lamotrigine/
29. lamotrigine.mp.
30. exp antidepressant agent/
31. antidepressant.mp.
32. exp duloxetine/

33. duloxetine.mp.
34. exp amitriptyline/
35. amitriptyline.mp.
36. exp nortriptyline/
37. nortriptyline.mp.
38. exp venlafaxine/
39. venlafaxine.mp.
40. exp milnacipran/
41. Milnacipran.mp.
42. (serotonin adj5 inhibitor).mp.
43. exp capsaicin/
44. capsaicin.mp.
45. exp lidocaine/
46. lidocaine.mp.
47. lignocaine.mp.
48. exp regional anesthesia/
49. exp local anesthesia/
50. anaesth\*.mp.
51. anesth\*.mp.
52. exp ketamine/
53. ketamine.mp.
54. (neuropath\* adj3 drug).mp.
55. (neuropath\* adj3 agent).mp.
56. or/17-55
57. 5 and 16 and 56

**MEDLINE search strategy**

1. exp burn/
2. burn\*.tw.
3. (thermal adj3 injur\*).tw.
4. 1 or 2 or 3
5. exp pain/
6. pain.tw.
7. exp chronic pain/
8. chronic pain.tw.
9. exp neuralgia/
10. neuralgia.tw.
11. exp neuropathic pain/
12. exp pruritus/
13. pruritis.tw.
14. itch\*.tw.
15. or/5-14
16. exp anticonvulsive agent/
17. anticonvuls\*.mp.
18. antiepilept\*.mp.
19. exp gabapentin/
20. gabapentin\*.mp.
21. exp pregabalin/
22. pregabalin.mp.
23. exp carbamazepine/
24. carbamazepine.mp.
25. exp oxcarbazepine/
26. Oxcarbazepine.mp.
27. exp lamotrigine/
28. lamotrigine.mp.
29. antidepressant.mp.
30. exp duloxetine/
31. duloxetine.mp.
32. exp amitriptyline/

33. amitriptyline.mp.
34. exp nortriptyline/
35. nortriptyline.mp.
36. exp venlafaxine
37. venlafaxine.mp.
38. exp milnacipran/
39. Milnacipran.mp.
40. (serotonin adj5 inhibitor).mp.
41. exp capsaicin/
42. capsaicin.mp.
43. exp lidocaine/
44. lidocaine.mp.
45. lignocaine.mp.
46. exp regional anesthesia/
47. exp local anesthesia/
48. anaesth\*.mp.
49. anesth\*.mp.
50. exp ketamine/
51. ketamine.mp.
52. (neuropath\* adj3 drug).mp.
53. (neuropath\* adj3 agent).mp.
54. exp Antidepressive Agents/
55. or/16-54
56. 4 and 15 and 55

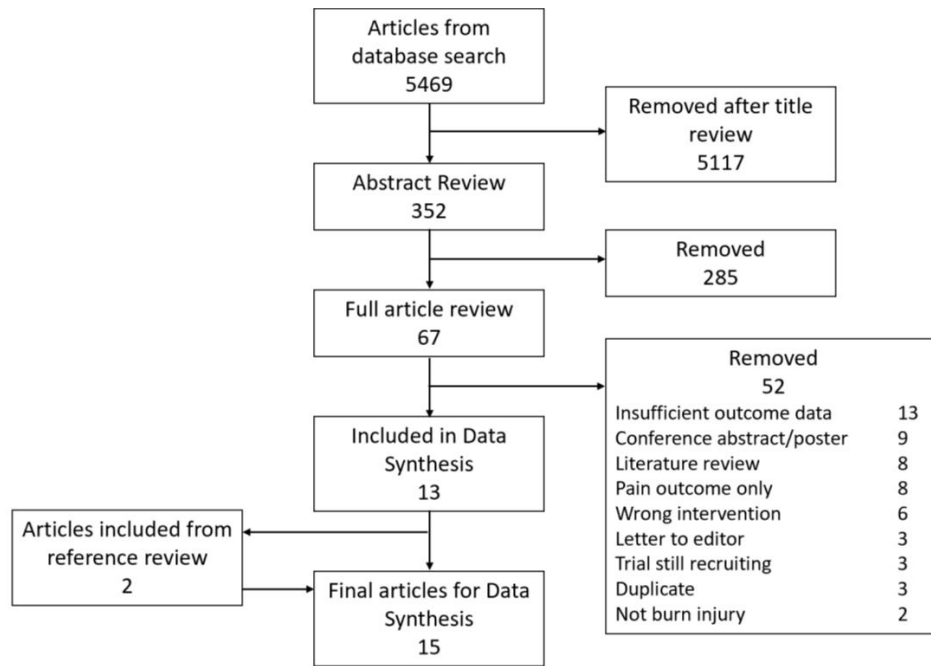

Figure S1 PRISMA flowchart



| <b>Paper</b> | <b>Randomisation Process</b> | <b>Deviations from intended intervention</b> | <b>Missing outcome data</b> | <b>Measurement of the Outcome</b> | <b>Selection of Reported Results</b> | <b>Overall</b> |
|--------------|------------------------------|----------------------------------------------|-----------------------------|-----------------------------------|--------------------------------------|----------------|
| Ahuja 2011   | Low                          | Some concern                                 | Low                         | Some concern                      | Some concern                         | Some concern   |
| Ahuja 2013   | Low                          | Some concern                                 | Some concern                | Some concern                      | Low                                  | Some concern   |
| Demling 2002 | Some concern                 | High risk                                    | Low                         | High risk                         | Low                                  | High risk      |
| Demling 2003 | Some concern                 | High risk                                    | Low                         | High risk                         | low                                  | High risk      |
| Gray 2011    | Low                          | Low                                          | Low                         | Low                               | Low                                  | Low            |
| Jones 2019   | Some concern                 | Low                                          | Some concern                | Low                               | Low                                  | Some concern   |
| Kwa 2019     | Low                          | Low                                          | Some concern                | Low                               | Low                                  | Some concern   |
| Kwa 2020     | Low                          | Low                                          | Low                         | Low                               | Low                                  | Low            |
| Zheng 2015   | Some concern                 | Some concern                                 | Low                         | Low                               | Low                                  | Some concern   |

Table S1. Risk of Bias assessment using the RoB2 (Cochrane risk of bias tool) for randomised control trials.

| <b>Paper</b>        | <b>Confounding</b> | <b>Patient Selection</b> | <b>Classification of Intervention</b> | <b>Deviations from Intervention</b> | <b>Missing Data</b> | <b>Measurement of Outcome</b> | <b>Selection of Reported Results</b> | <b>Overall</b> |
|---------------------|--------------------|--------------------------|---------------------------------------|-------------------------------------|---------------------|-------------------------------|--------------------------------------|----------------|
| Goutos 2010         | Low                | Moderate                 | Low                                   | Low                                 | Low                 | Serious                       | Moderate                             | Serious        |
| Kaul 2018           | Low                | Moderate                 | Low                                   | Low                                 | Low                 | Serious                       | Low                                  | Serious        |
| Kneib 2019          | Low                | Low                      | Low                                   | Low                                 | Low                 | Low                           | Low                                  | Low            |
| Kopecky 2001        | Low                | Moderate                 | Low                                   | Low                                 | Low                 | Serious                       | Low                                  | Serious        |
| Mendham 2004        | Low                | Low                      | Low                                   | Low                                 | Low                 | Serious                       | Serious                              | Serious        |
| Nieuwendijk 2018    | Moderate           | Moderate                 | Moderate                              | Moderate                            | Low                 | Low                           | Moderate                             | Moderate       |
| Orellana Silva 2013 | Moderate           | Low                      | Low                                   | Low                                 | Low                 | Moderate                      | Low                                  | Moderate       |
| Zachariah 2012      | Moderate           | Low                      | Low                                   | Low                                 | Low                 | Moderate                      | Moderate                             | Moderate       |

Table S2. Risk of bias assessment using ROBINS-I tool for non-randomised studies

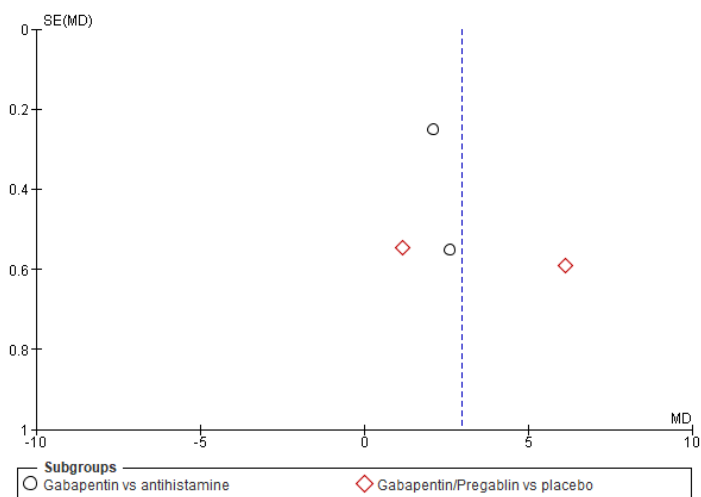

Figure S2. Funnel plot of trials included in meta-analysis of gabapentinoids for management of pruritus

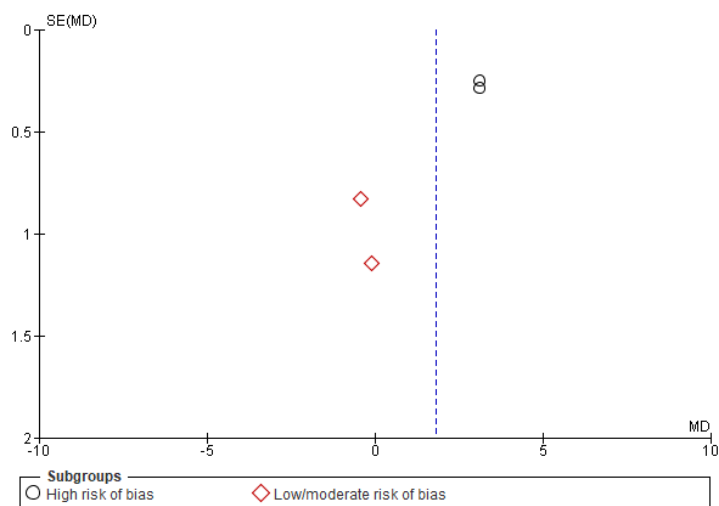

Figure S3. Funnel plot of trials included in meta-analysis of doxepin for management of pruritus

| <b>Meta-analysis</b>                                | <b>Participants (studies)</b> | <b>Improvement in mean VAS (95% CI)</b> | <b>Certainty of evidence (GRADE)</b> |
|-----------------------------------------------------|-------------------------------|-----------------------------------------|--------------------------------------|
| Gabapentin vs antihistamine                         | 80 (2 studies)                | 2.19 (1.74-2.63)                        | Moderate <sup>1</sup>                |
| Gabapentinoid vs placebo                            | 128 (2 studies)               | 3.63 (-1.20-8.46)                       | Low <sup>1,2,3</sup>                 |
| Gabapentinoid vs control (All studies)              | 208 (4 studies)               | 2.96 (1.20-4.73)                        | Moderate <sup>1,2</sup>              |
| Doxepin vs control (High risk bias studies)         | 72 (2 studies)                | 3.10 (2.73-3.47)                        | Very low <sup>4</sup>                |
| Doxepin vs control (Low/moderate risk bias studies) | 61 (2 studies)                | -0.32 (-1.64-0.99)                      | Moderate <sup>1,3</sup>              |
| Doxepin vs control (All studies)                    | 133 (4 studies)               | 1.82 (0.55-3.09)                        | Very low <sup>4</sup>                |

Table S3. GRADE assessment of evidence

GRADE Working Group grades of evidence:

- High certainty: We are very confident that the true effect lies close to that of the estimate of the effect
- Moderate certainty: We are moderately confident in the effect estimate: The true effect is likely to be close to the estimate of the effect, but there is a possibility that it is substantially different
- Low certainty: Our confidence in the effect estimate is limited: The true effect may be substantially different from the estimate of the effect
- Very low certainty: We have very little confidence in the effect estimate: The true effect is likely to be substantially different from the estimate of effect

<sup>1</sup> Risk of bias - Some concerns

<sup>2</sup> Indirectness - Inclusion of participants with neuropathic pain being the primary symptom rather than pruritus

<sup>3</sup> Imprecision - Confidence intervals cross the threshold for meaningful effect

<sup>4</sup> Risk of Bias - Serious concerns, high risk of bias
